# Supplementary material for: Optimizing sgRNA length to improve target specificity and efficiency for the GGTA1 gene using the CRISPR/Cas9 gene editing system
Source: PubMed Central journal article supplement (PMC6903732; doi:10.1371/journal.pone.0226107), 2019-12-10

**Fig 2 Raw Image**

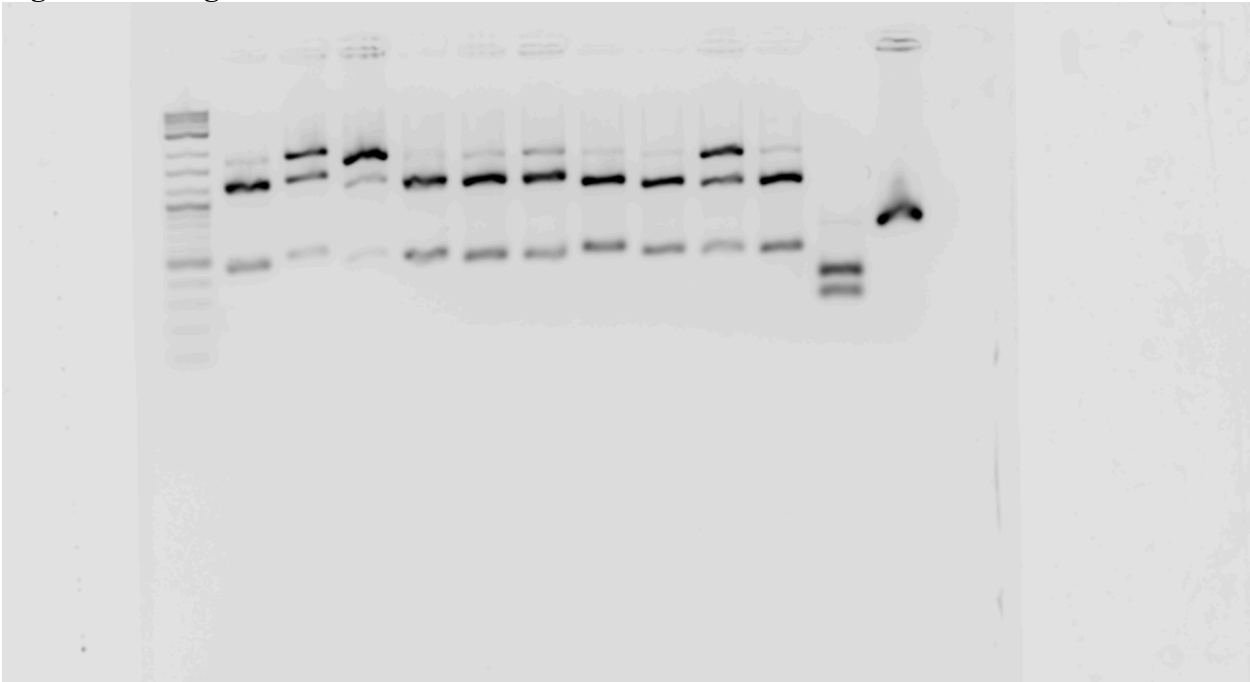

**Fig 3 Raw Image**

**A**

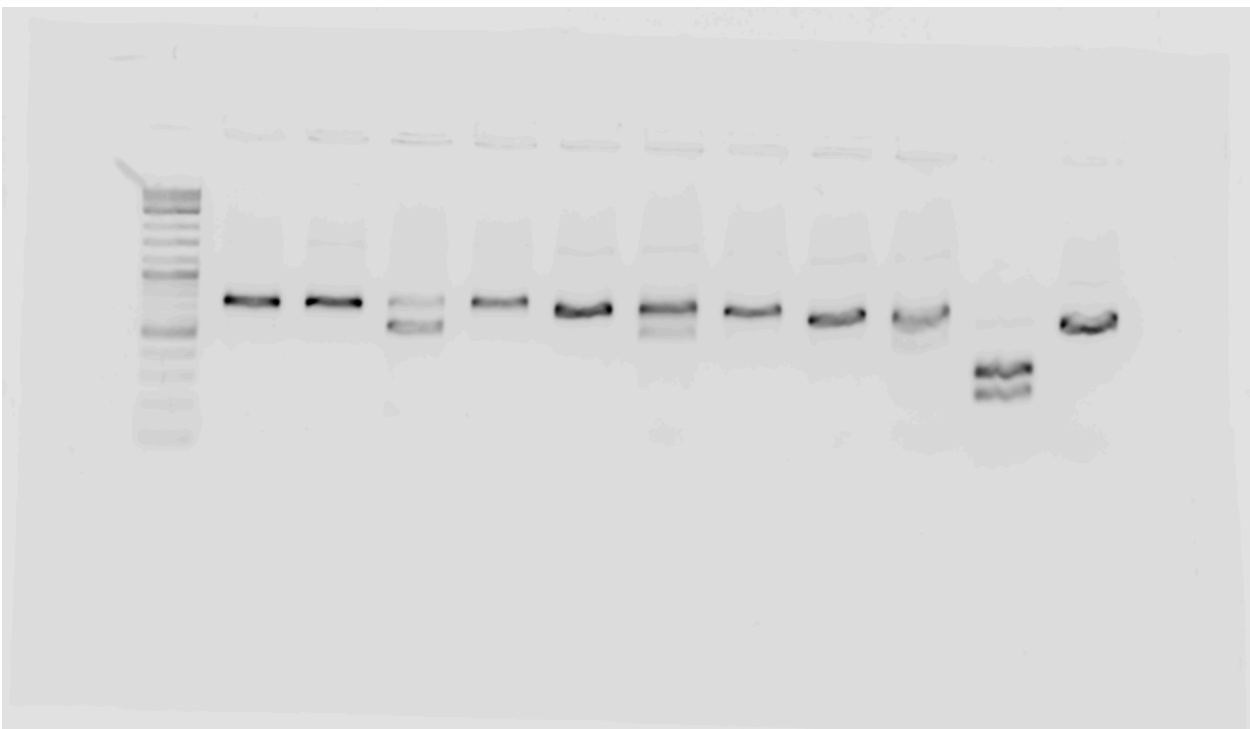

**B**

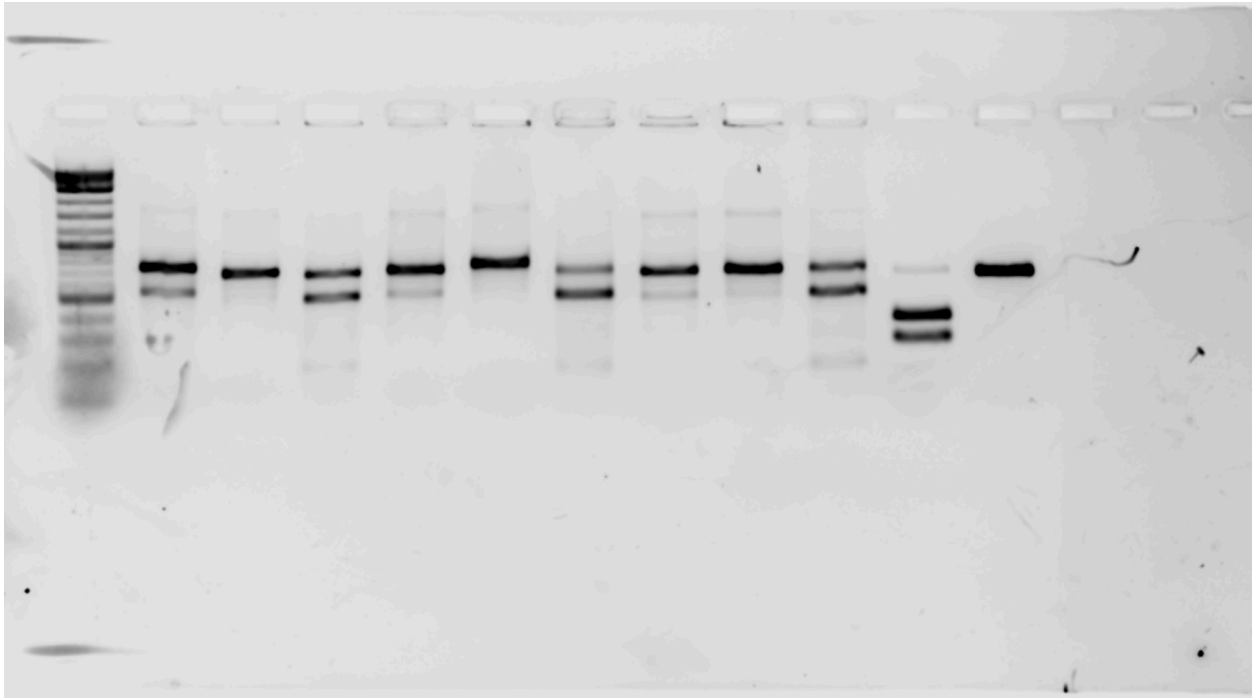

**C**

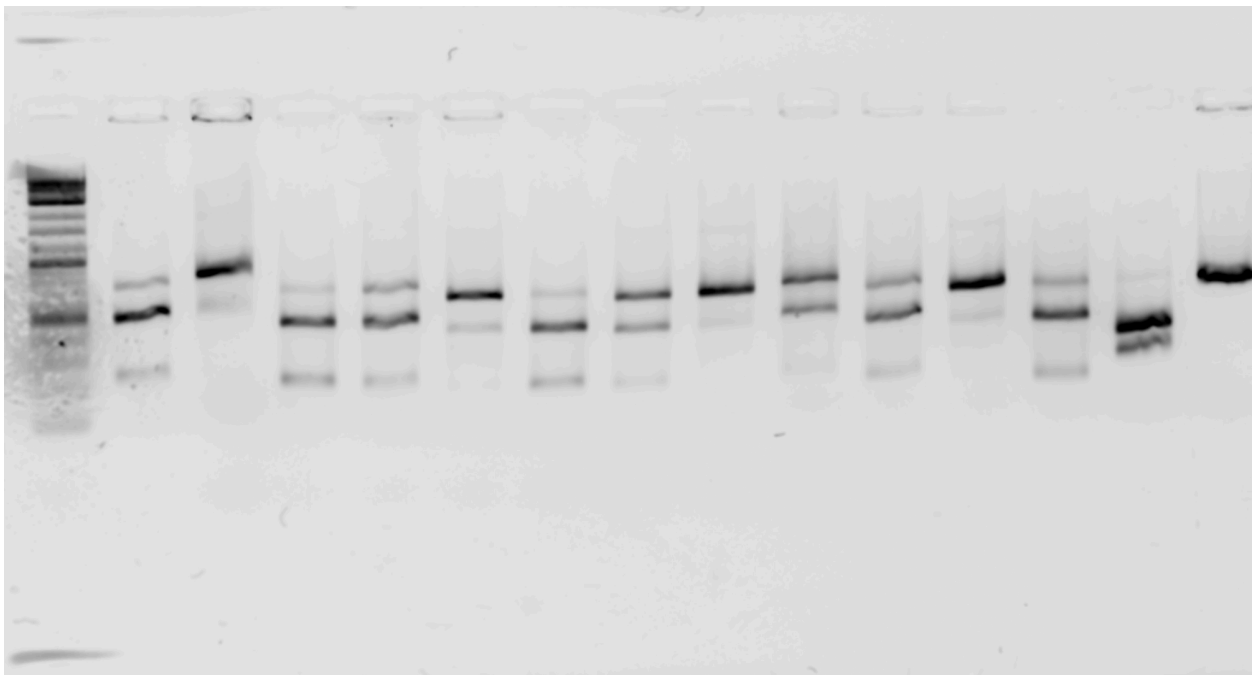

Supplement: pone.0226107.s002.pdf [file pone.0226107.s002.pdf]
